# Supplementary material for: P-CRS: A Clinical Scale to Assess the Parent-Child Relationship in Infancy and Early Childhood
Source: MDPI journal article supplement (doi:10.3390/ijerph17103458), 2020-05-15
Supplement: s1 [file s1]

## Supplementary

Table S1. Descriptive Statistical Analysis of P-CRS items.

|                                                                                                                                                                                                 | <b>M</b> | <b>SD</b> | <b>Skewness</b> | <b>Kurtosis</b> |
|-------------------------------------------------------------------------------------------------------------------------------------------------------------------------------------------------|----------|-----------|-----------------|-----------------|
| 1. The interactions are pleasant for the child and for the parent and without reasons for anxiety <sup>a</sup>                                                                                  | 2.54     | 1.18      | 0.21            | -0.91           |
| 2. The relationship clearly promotes the growth of both child and parent <sup>a</sup>                                                                                                           | 2.43     | 1.19      | 0.45            | -0.68           |
| 3. Interactions are frequently reciprocal and synchronous <sup>a</sup>                                                                                                                          | 2.71     | 1.21      | 0.07            | -1.01           |
| 4. Sometimes the parent and the child may be in conflict, but this does not last for more than a few days <sup>a</sup>                                                                          | 2.63     | 1.40      | 0.41            | -1.08           |
| 5. The parent is able to fully support the functional capabilities appropriate to the age of the child <sup>b</sup>                                                                             | 2.54     | 1.22      | 0.46            | -0.68           |
| 6. There is a disturbance in the relationship, but it is limited to only one aspect of functioning (e.g., power supply, play, regulation, etc.) <sup>a</sup>                                    | 2.13     | 1.41      | 0.94            | -0.50           |
| 7. If the child and the parent experience anxiety this lasts for a month or more; however, the relationship maintains an adaptive flexibility (e.g., through negotiation) <sup>a</sup>          | 1.88     | 1.20      | 1.18            | 0.28            |
| 8. If the parent and child are in conflict, this affects more areas of functioning <sup>a</sup>                                                                                                 | 2.17     | 1.30      | 0.76            | -0.62           |
| 9. The parent is unable to sustain entire areas of the child's functioning <sup>b</sup>                                                                                                         | 1.97     | 1.28      | 1.16            | 0.13            |
| 10. Most interactions between the child and the parent are conflicting and associated with a state of anxiety <sup>a</sup>                                                                      | 1.69     | 1.10      | 1.58            | 1.55            |
| 11. The relationship, even in the absence of conflict, may be inappropriate from the point of view of the child's development (e.g., the child is treated as younger than his age) <sup>a</sup> | 2.09     | 1.36      | 0.89            | -0.59           |
| 12. In the report, there are dysfunctional patterns that appear deeply rooted <sup>a</sup>                                                                                                      | 1.88     | 1.28      | 1.26            | 0.31            |
| 13. The child has a disability that alters the parent's ability to maintain an adequate relationship <sup>c</sup>                                                                               | 2.21     | 1.55      | 0.87            | -0.86           |
| 14. Interactions are so frequently disturbed that the child is in imminent danger of physical harm <sup>a*</sup>                                                                                | 1.18     | 0.59      | 3.76            | 14.87           |
| 15. The parent often interferes with the child's goals and wishes because they do not perceive the child as a separate individual with their own needs <sup>b</sup>                             | 1.92     | 1.10      | 0.92            | -0.23           |
| 16. The parent dominates the child and he/she may appear submissive with compliant behaviors <sup>b*</sup>                                                                                      | 1.24     | 0.66      | 3.45            | 13.62           |

|                                                                                                                                                                                                                                                     |      |      |      |       |
|-----------------------------------------------------------------------------------------------------------------------------------------------------------------------------------------------------------------------------------------------------|------|------|------|-------|
| 17. The parent dominates the child, who reacts with provocative behavior <sup>b</sup>                                                                                                                                                               | 1.42 | 0.85 | 2.26 | 4.94  |
| 18. The parent makes requests that are not appropriate to the child's level of development <sup>b</sup>                                                                                                                                             | 1.80 | 1.15 | 1.31 | 0.72  |
| 19. In the interaction with the parent, the child may appear to be late in motor skills and / or expressive language <sup>c</sup>                                                                                                                   | 2.43 | 1.51 | 0.52 | -1.23 |
| 20. The child shows a narrow range of affective expressions <sup>c</sup>                                                                                                                                                                            | 2.12 | 1.41 | 0.95 | -0.49 |
| 21. The parent may perceive the child as a partner or as a peer <sup>b*</sup>                                                                                                                                                                       | 1.24 | 0.72 | 3.36 | 10.88 |
| 22. The child shows difficulty in separation <sup>c</sup>                                                                                                                                                                                           | 2.14 | 1.31 | 0.81 | -0.56 |
| 23. The parent shows sporadic or infrequent involvement or bonding <sup>b</sup>                                                                                                                                                                     | 1.28 | 0.70 | 2.78 | 7.61  |
| 24. The parent is insensitive and / or unresponsive to the child's signals <sup>b</sup>                                                                                                                                                             | 1.28 | 0.66 | 2.62 | 7.03  |
| 25. There is a lack of coherence between the attitudes expressed by the parent toward the child and the observable quality of the interactions (predictability and / or reciprocity are absent in the sequence and order of exchanges) <sup>a</sup> | 1.69 | 1.09 | 1.57 | 1.63  |
| 26. The parent ignores, refuses, or is unable to comfort the child <sup>b</sup>                                                                                                                                                                     | 1.40 | 0.80 | 2.28 | 5.25  |
| 27. The parent is unable to adequately reflect the affective state of the child <sup>b</sup>                                                                                                                                                        | 1.94 | 1.12 | 0.94 | -0.13 |
| 28. Interactions lack vitality and mutual pleasure <sup>a</sup>                                                                                                                                                                                     | 1.60 | 0.95 | 1.64 | 2.08  |
| 29. The child and the parent appear detached, with little eye contact and little physical closeness <sup>a</sup>                                                                                                                                    | 1.47 | 0.86 | 1.91 | 3.06  |
| 30. The affective tone of the relationship is flat and constricted and characterized by withdrawal and sadness <sup>a</sup>                                                                                                                         | 1.37 | 0.82 | 2.66 | 7.34  |
| 31. Interactions are tense and do not give a sense of tranquility, fun, or mutuality <sup>a</sup>                                                                                                                                                   | 1.67 | 1.05 | 1.55 | 1.59  |
| 32. The parent and the child present an anxious mood observable through motor tension, apprehension, agitation, facial expression, vocalization, or language <sup>a</sup>                                                                           | 2.00 | 1.21 | 0.98 | -0.10 |
| 33. The parent's physical handling of the child may be awkward <sup>b</sup>                                                                                                                                                                         | 1.25 | 0.64 | 2.96 | 9.29  |
| 34. The parent appears overprotective and expresses frequent concern regarding the child's wellbeing, behavior, or development <sup>b</sup>                                                                                                         | 2.53 | 1.34 | 0.39 | -1.03 |
| 35. The child is condescending or anxious toward the parent in an unusual way <sup>c</sup>                                                                                                                                                          | 1.32 | 0.74 | 2.66 | 7.21  |
| 36. Both the parent and the child are hyper-responsive to one another <sup>a</sup>                                                                                                                                                                  | 1.73 | 1.02 | 1.22 | 0.54  |

|                                                                                                                                                             |      |      |      |        |
|-------------------------------------------------------------------------------------------------------------------------------------------------------------|------|------|------|--------|
| 37. The report is characterized by rough and abrupt interactions, often devoid of emotional reciprocity <sup>a</sup>                                        | 1.25 | 0.64 | 2.93 | 9.12   |
| 38. Especially when they see the child as too dependent and demanding, the parent is insensitive to the child's signals <sup>b</sup>                        | 1.31 | 0.75 | 2.84 | 8.40   |
| 39. The parent taunt or tease the child <sup>b*</sup>                                                                                                       | 1.08 | 0.37 | 5.51 | 34.61  |
| 40. Interactions have a hostile or angry edge <sup>a*</sup>                                                                                                 | 1.23 | 0.65 | 3.17 | 10.35  |
| 41. The child may exhibit fearful, vigilant, and avoidant behaviors <sup>c*</sup>                                                                           | 1.12 | 0.46 | 4.81 | 27.79  |
| 42. The child manifests provocative and aggressive behaviors toward the parent <sup>c</sup>                                                                 | 1.57 | 1.04 | 1.81 | 2.38   |
| 43. In the relationship there are severe verbal and/or emotional abusive contents <sup>a*</sup>                                                             | 1.04 | 0.29 | 7.72 | 62.77  |
| 44. The content of verbal/emotional abuse by the parent is intended to severely belittle, blame, attack, overcontrol, and/or reject the child <sup>b*</sup> | 1.11 | 0.46 | 5.04 | 29.41  |
| 45. The parent misinterprets the baby's crying as a deliberate negative reaction to them <sup>b</sup>                                                       | 1.38 | 0.77 | 2.09 | 3.54   |
| 46. The parent physically harms the child <sup>b*</sup>                                                                                                     | 1.08 | 0.39 | 5.42 | 31.58  |
| 47. The parent has difficulty limits to the child in a non-violent manner <sup>b*</sup>                                                                     | 1.26 | 0.75 | 3.46 | 12.66  |
| 48. The relationship involves a lack of compliance with physical boundaries and an extreme sexualized intrusiveness <sup>a*</sup>                           | 1.03 | 0.23 | 9.92 | 115.57 |
| 49. The parent shows sexually seductive and overstimulating behavior <sup>b*</sup>                                                                          | 1.01 | 0.11 | 9.34 | 85.96  |
| 50. The parent neglects the child with respect to his physical and emotional needs <sup>b*</sup>                                                            | 1.19 | 0.65 | 3.93 | 16.18  |

---

<sup>a</sup> Items marked with an "a" belong to "Interaction Area", <sup>b</sup> Items marked with a "b" belong to "Parent Area", <sup>c</sup> Items marked with a "c" belong to "Child Area", \* Items marked with an asterisk have been delated because their distribution does not respect the normality assumption.
